# Supplementary material
Source: PubMed Central journal article supplement (PMC4485604)
Supplement: NIHMS674749-supplement-2.pdf [file NIHMS674749-supplement-2.pdf]

**Supplemental Table 1: Generalized Estimating Equations Models**

|                                        | Electrogram Parameters |         |                       |         |                 |         |
|----------------------------------------|------------------------|---------|-----------------------|---------|-----------------|---------|
|                                        | Bipolar Voltage (mV)   |         | Unipolar Voltage (mV) |         | Duration (msec) |         |
|                                        | B                      | P       | B                     | P       | B               | P       |
| CT Intensity (Hounsfield units)        | 0.019                  | <0.001* | 0.032                 | <0.001* | -0.277          | <0.001* |
| Left Ventricular Wall thickness (mm)   | 0.254                  | <0.001* | 0.534                 | <0.001* | -2.720          | <0.001* |
| Body Mass Index                        | -0.037                 | 0.019*  | -0.021                | 0.728   | -0.156          | 0.903   |
| Left Ventricular Ejection Fraction (%) | -0.015                 | 0.019*  | -0.008                | 0.738   | -0.030          | 0.947   |
| Age (years)                            | 0.007                  | 0.311   | 0.019                 | 0.505   | -1.504          | 0.008   |

Significant regression coefficients and P-values defined as  $P < 0.05$  are shown by asterisks (\*).

B=regression coefficients; P=P-value.
